# Supplementary material for: In Situ Collection and Preservation of Intact Microcystis Colonies to Assess Population Diversity and Microcystin Quotas
Source: PubMed Central journal article supplement (PMC6722930; doi:10.3390/toxins11080435), 2019-07-24

# Supplementary Materials: In Situ Collection and Preservation of Intact *Microcystis* Colonies to Assess Population Diversity and Microcystin Quotas

Jonathan Puddick, Eric O Goodwin, Ian Hawes, David P Hamilton and Susanna A Wood

**Table 1.** Image analysis information to determine colony volume.

| Image ID | Colony ID | Ice Sheet ID | Ice Sheet Thickness (mm) | Pixel Area | Pixel Volume | Pixels per mm | Volume (mm <sup>3</sup> ) | Analysis Conducted |
|----------|-----------|--------------|--------------------------|------------|--------------|---------------|---------------------------|--------------------|
| 1        | 3         | 1D           | 1.5                      | 20225      | 6008         | 96            | 0.66                      | LCMS, qPCR         |
| 2        | 6         | 1B           | 2                        | 19098      | 14797        | 103           | 1.40                      | LCMS, qPCR         |
| 3        | 7         | 1B           | 2                        | 3265       | 2579         | 105           | 0.23                      | LCMS, qPCR         |
| 4        | 12        | 2B           | 2                        | 43362      | 40788        | 51            | 15.46                     | LCMS, qPCR, HTS    |
| 5        | 14        | 2B           | 2                        | 9778       | 13537        | 140           | 0.69                      | LCMS, qPCR         |
| 6        | 15        | 2B           | 2                        | 5758       | 3801         | 140           | 0.19                      | LCMS, qPCR         |
| 7        | 23        | 4A           | 3                        | 36921      | 42670        | 40            | 26.76                     | LCMS, qPCR         |
| 8        | 25        | 5E           | 3                        | 27883      | 30095        | 61            | 8.13                      | LCMS, qPCR, HTS    |
| 9        | 27        | 5H           | 3.5                      | 72181      | 116723       | 63            | 29.43                     | LCMS, qPCR, HTS    |
| 10       | 29        | 5H           | 3.5                      | 56869      | 52628        | 85            | 7.28                      | LCMS, qPCR         |
| 11       | 30        | 5G           | 3.5                      | 13707      | 10973        | 61            | 2.97                      | LCMS, qPCR, HTS    |
| 12       | 31        | 5G           | 3.5                      | 40847      | 43036        | 54            | 14.92                     | HTS                |
| 13       | 32        | 4B           | 3.5                      | 15514      | 20666        | 56            | 6.58                      | LCMS, qPCR, HTS    |
| 14       | 33        | 2D           | 2.5                      | 60212      | 56489        | 38            | 39.93                     | LCMS, qPCR, HTS    |
| 15       | 34        | 2D           | 2.5                      | 34732      | 30711        | 89            | 3.90                      | HTS                |
| 16       | 37        | 2C           | 2.5                      | 26685      | 19192        | 84            | 2.72                      | HTS                |
| 17       | 49        | 5D           | 3                        | 35915      | 53138        | 40            | 33.79                     | LCMS, qPCR, HTS    |
| 18       | 50        | 5D           | 3                        | 26036      | 23349        | 37            | 16.70                     | LCMS, qPCR, HTS    |
| 19       | 51        | 5D           | 3                        | 41374      | 60700        | 93            | 6.97                      | HTS                |
| 20       | 52        | 5D           | 3                        | 29528      | 34669        | 75            | 6.20                      | HTS                |
| 21       | 53        | 5D           | 3                        | 19141      | 32120        | 135           | 1.75                      | HTS                |
| 22       | 55        | 5D           | 3                        | 9215       | 7507         | 135           | 0.41                      | LCMS, qPCR         |
| 23       | 56        | 5D           | 3                        | 24775      | 24115        | 110           | 2.01                      | LCMS, qPCR         |
| 24       | 58        | 5F           | 3                        | 17122      | 13718        | 58            | 4.03                      | LCMS, qPCR, HTS    |
| 25       | 59        | 5F           | 3                        | 12437      | 13243        | 107           | 1.15                      | LCMS, qPCR, HTS    |

|    |    |    |     |       |       |    |      |                    |
|----|----|----|-----|-------|-------|----|------|--------------------|
| 26 | 61 | 2E | 3   | 13704 | 12296 | 65 | 2.88 | LCMS, qPCR,<br>HTS |
| 27 | 62 | 2E | 3   | 9036  | 4956  | 82 | 0.74 | LCMS, qPCR,<br>HTS |
| 28 | 65 | 3C | 2.5 | 7406  | 8672  | 82 | 1.30 | LCMS, qPCR         |
| 29 | 66 | 3C | 2.5 | 19757 | 26466 | 89 | 3.37 | HTS                |
| 30 | 70 | 3C | 2.5 | 15295 | 14989 | 79 | 2.38 | HTS                |
| 31 | 72 | 3C | 2.5 | 7844  | 6548  | 82 | 0.98 | LCMS, qPCR         |
| 32 | 73 | 3C | 2.5 | 9307  | 6000  | 96 | 0.66 | LCMS, qPCR         |

LCMS = liquid chromatography mass spectrometry analysis for microcystin concentration; qPCR = quantitative polymerase chain analysis for concentration of microcystin-producing *Microcystis*; HTS = high-throughput sequencing of the cyanobacterial internal transcribed spacer gene to assess *Microcystis* population diversity.

**Table 2.** Microcystin quota information for relevant colony samples.

| Colony ID | Ice Sheet ID <sup>a</sup> | Colony Volume (mm <sup>3</sup> ) | MC Concentration (ng/mL) | <i>mcyE</i> Concentration (Copies/mL) | MC Quota (fg/Toxic Cell) |
|-----------|---------------------------|----------------------------------|--------------------------|---------------------------------------|--------------------------|
| 3         | 1D                        | 0.66                             | 1,943                    | 833,724,153                           | 2.3                      |
| 6         | 1B                        | 1.40                             | 3,378                    | 348,986,248                           | 9.7                      |
| 7         | 1B                        | 0.23                             | 201                      | 3,270,700                             | 61.4                     |
| 12        | 2B                        | 15.46                            | 13,802                   | 1,767,185,139                         | 7.8                      |
| 14        | 2B                        | 0.69                             | 1,358                    | 129,226,089                           | 10.5                     |
| 15        | 2B                        | 0.19                             | 572                      | 43,086,887                            | 13.3                     |
| 23        | 4A                        | 26.76                            | 36,946                   | 189,632,051                           | 194.8                    |
| 25        | 5E                        | 8.13                             | 5,764                    | 342,795,027                           | 16.8                     |
| 27        | 5H                        | 29.43                            | 28,615                   | 917,401,710                           | 31.2                     |
| 29        | 5H                        | 7.28                             | 8,509                    | 903,981,200                           | 9.4                      |
| 30        | 5G                        | 2.97                             | 5,970                    | 937,765,820                           | 6.4                      |
| 32        | 4B                        | 6.58                             | 8,428                    | 386,074,613                           | 21.8                     |
| 33        | 2D                        | 39.93                            | 33,404                   | 389,392,555                           | 85.8                     |
| 49        | 5D                        | 33.79                            | 35,691                   | 653,422,733                           | 54.6                     |
| 50        | 5D                        | 16.70                            | 24,015                   | 225,007,350                           | 106.7                    |
| 55        | 5D                        | 0.41                             | 1,295                    | 135,094,427                           | 9.6                      |
| 56        | 5D                        | 2.01                             | 3,710                    | 51,860,037                            | 71.5                     |
| 58        | 5F                        | 4.03                             | 16,211                   | 544,497,945                           | 29.8                     |
| 59        | 5F                        | 1.15                             | 4,510                    | 128,839,838                           | 35.0                     |
| 61        | 2E                        | 2.88                             | 4,861                    | 239,371,820                           | 20.3                     |
| 62        | 2E                        | 0.74                             | 4,359                    | 164,464,003                           | 26.5                     |
| 65        | 3C                        | 1.30                             | 2,550                    | 430,531,930                           | 5.9                      |
| 72        | 3C                        | 0.98                             | 2,444                    | 152,240,662                           | 16.1                     |
| 73        | 3C                        | 0.66                             | 1,685                    | 279,687,773                           | 6.0                      |

<sup>a</sup> The ice sheet number corresponds to the collection site/time (see Supplementary Table S4 for more information). MC = microcystin; *mcyE* = microcystin synthase gene E.

**Table S3:** Sample information for high-throughput sequencing of the cyanobacterial internal transcribed spacer (ITS) gene for relevant colony samples.

| Colony ID | Ice Sheet ID <sup>a</sup> | Colony Volume (mm <sup>3</sup> ) | Number of Reads for <i>Microcystis</i> ITS Operational Taxonomic Units (OTUs) |       |       |       |       |       |        |       |         |       | Total |       |
|-----------|---------------------------|----------------------------------|-------------------------------------------------------------------------------|-------|-------|-------|-------|-------|--------|-------|---------|-------|-------|-------|
|           |                           |                                  | OTU_8                                                                         | OTU_1 | OTU_2 | OTU_3 | OTU_7 | OTU_6 | OTU_13 | OTU_4 | OTU_436 | OTU_5 |       |       |
| 12        | 2B                        | 15.46                            | 348                                                                           | 3     | 1     | 0     | 0     | 0     | 0      | 0     | 0       | 0     | 0     | 352   |
| 25        | 5E                        | 8.13                             | 1,496                                                                         | 53    | 1     | 1     | 2     | 0     | 0      | 0     | 0       | 0     | 0     | 1,553 |
| 27        | 5H                        | 29.43                            | 1,153                                                                         | 55    | 9     | 0     | 0     | 2     | 0      | 0     | 0       | 0     | 0     | 1,219 |
| 30        | 5G                        | 2.97                             | 444                                                                           | 153   | 19    | 1     | 0     | 0     | 0      | 0     | 2       | 0     | 0     | 619   |
| 31        | 5G                        | 14.92                            | 1,169                                                                         | 52    | 2     | 1     | 0     | 0     | 0      | 3     | 0       | 0     | 0     | 1,227 |
| 32        | 4B                        | 6.58                             | 1,195                                                                         | 48    | 2     | 0     | 0     | 0     | 0      | 0     | 0       | 2     | 0     | 1,247 |
| 33        | 2D                        | 39.93                            | 1,248                                                                         | 0     | 0     | 0     | 1     | 0     | 0      | 0     | 0       | 0     | 0     | 1,249 |
| 34        | 2D                        | 3.90                             | 1,230                                                                         | 0     | 0     | 0     | 0     | 0     | 1      | 0     | 0       | 0     | 0     | 1,231 |
| 37        | 2C                        | 2.72                             | 502                                                                           | 2     | 0     | 0     | 0     | 0     | 0      | 0     | 0       | 0     | 0     | 504   |
| 49        | 5D                        | 33.79                            | 613                                                                           | 15    | 1     | 1     | 0     | 0     | 0      | 0     | 0       | 0     | 0     | 630   |
| 50        | 5D                        | 16.70                            | 1,111                                                                         | 15    | 1     | 0     | 0     | 0     | 0      | 2     | 0       | 0     | 0     | 1,129 |
| 51        | 5D                        | 6.97                             | 341                                                                           | 5     | 1     | 0     | 0     | 0     | 0      | 0     | 0       | 0     | 0     | 347   |
| 52        | 5D                        | 6.20                             | 955                                                                           | 1     | 0     | 0     | 1     | 0     | 0      | 0     | 0       | 0     | 0     | 957   |
| 53        | 5D                        | 1.75                             | 668                                                                           | 42    | 2     | 0     | 0     | 0     | 0      | 0     | 0       | 0     | 0     | 712   |
| 58        | 5F                        | 4.03                             | 815                                                                           | 35    | 3     | 0     | 0     | 0     | 0      | 0     | 0       | 0     | 0     | 853   |
| 59        | 05F                       | 1.15                             | 787                                                                           | 86    | 4     | 0     | 0     | 0     | 0      | 0     | 0       | 0     | 2     | 879   |
| 61        | 2E                        | 2.88                             | 380                                                                           | 1     | 0     | 0     | 0     | 0     | 0      | 0     | 0       | 0     | 0     | 381   |
| 62        | 2E                        | 0.74                             | 367                                                                           | 0     | 0     | 0     | 0     | 0     | 0      | 0     | 0       | 0     | 0     | 367   |
| 66        | 3C                        | 3.37                             | 330                                                                           | 2     | 0     | 0     | 0     | 0     | 0      | 0     | 0       | 0     | 0     | 332   |
| 70        | 3C                        | 2.38                             | 375                                                                           | 0     | 0     | 0     | 0     | 0     | 0      | 0     | 0       | 0     | 0     | 375   |

<sup>a</sup> The ice sheet number corresponds to the collection site/time (see Supplementary Table S4 for more information).

**Table S4:** Information on sample collection time and location.

| <b>Collection<sup>a</sup></b> | <b>Date</b> | <b>Time</b> | <b>Site Name</b> | <b>Latitude</b> | <b>Longitude</b> |
|-------------------------------|-------------|-------------|------------------|-----------------|------------------|
| 1                             | 12/04/2014  | 1:02 pm     | Pontoon          | -41.27166       | 173.294077       |
| 2                             | 13/04/2014  | 4:05 pm     | Boat Bay         | -42.40908       | 173.582840       |
| 3                             | 13/04/2014  | 4:47 pm     | Pontoon          | -42.40874       | 173.583094       |
| 4                             | 14/04/2014  | 11:04 am    | Launch Bay       | -42.40859       | 173.578876       |
| 5                             | 14/04/2014  | 11:22 am    | Launch Bay       | -42.40871       | 173.578716       |

<sup>a</sup> Collection numbers correspond to the Ice Sheet ID.

**Figure S1.** Automated pixel selection for colony images where images alternate between the raw image and the selected area.

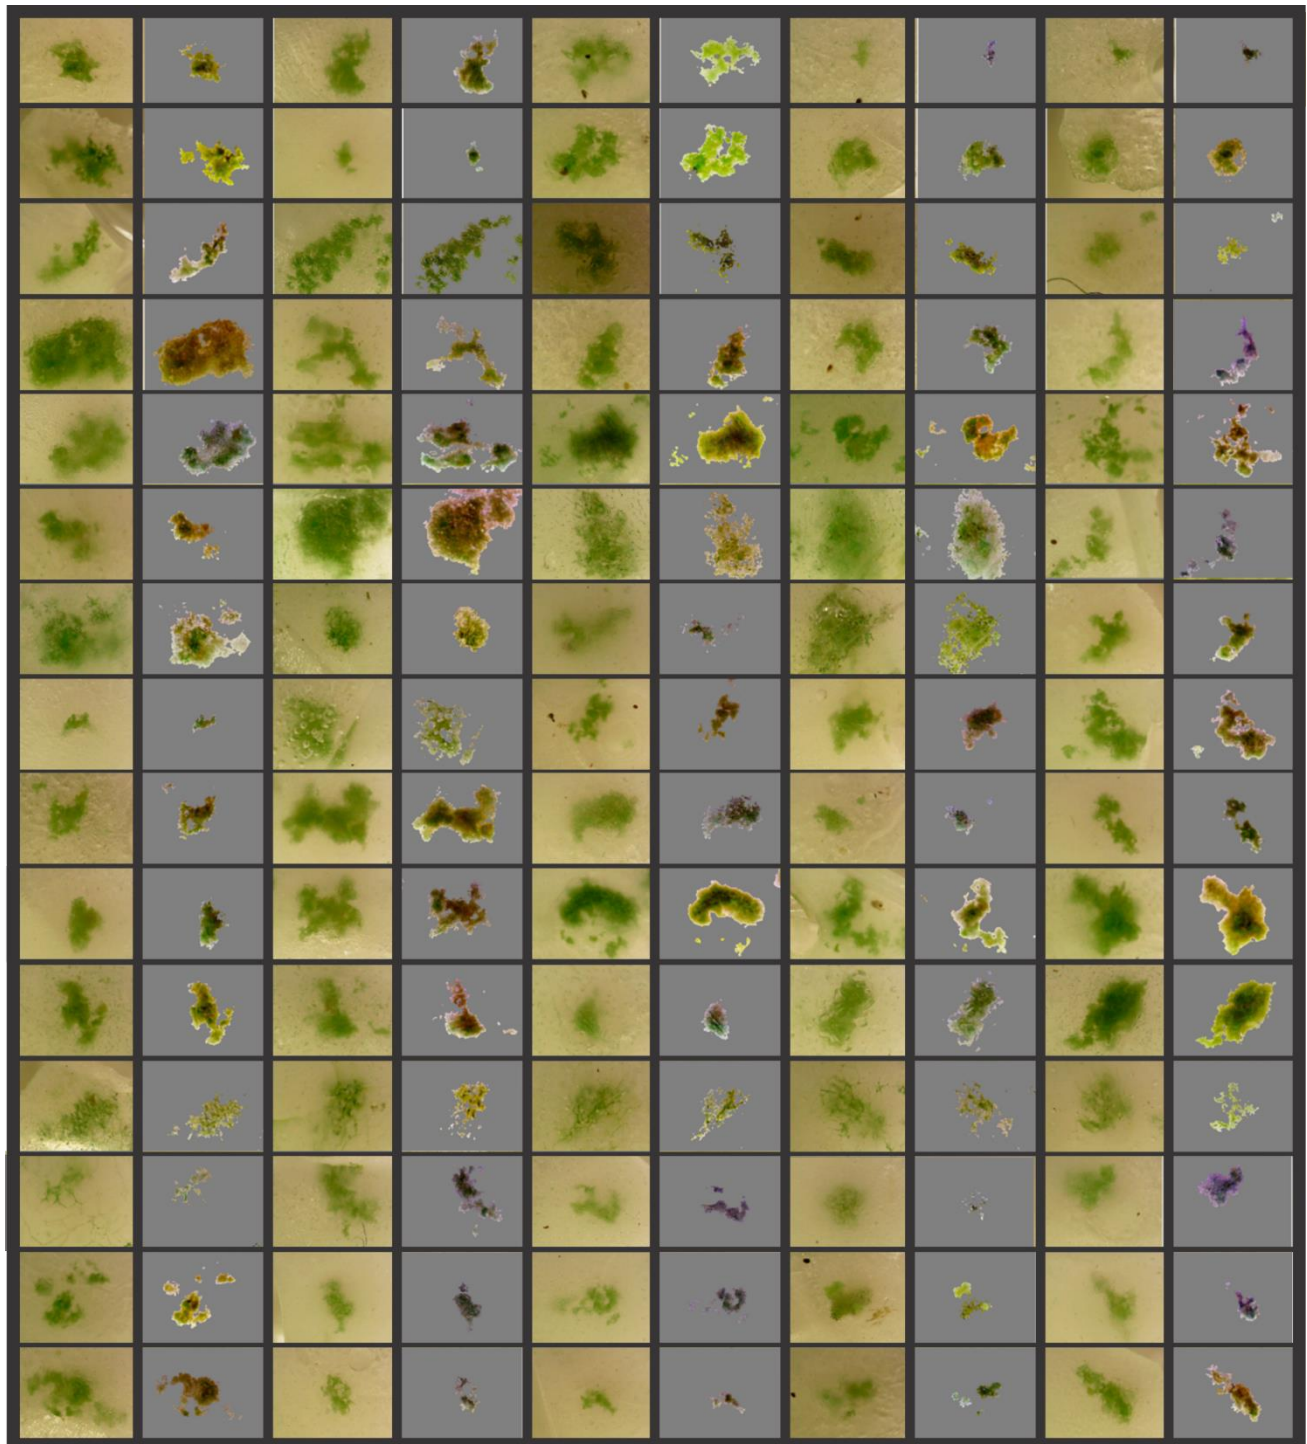

Supplement: toxins-11-00435-s001.pdf [file toxins-11-00435-s001.pdf]
